# Supplementary material for: Mass Generation, Neuron Labelling and 3D Imaging of Minibrains
Source: bioRxiv or medRxiv preprint supplement (doi:10.1101/2020.07.11.198531), 2020-07-16
Supplement: Supplementary file [file media-7.pdf]

## Price of medium

| EXPANSION MEDIUM       | Supplier      | Reference | Price /100 ml     |
|------------------------|---------------|-----------|-------------------|
| GlutaMAX™-I Supplement | ThermoFischer | 35050038  | 1.12 CHF          |
| Stempro™ NSC SFM (kit) | ThermoFischer | A1050901  | 99.00 CHF         |
| <b>Total</b>           |               |           | <b>100.12 CHF</b> |

| Diff1 medium           | Supplier      | Reference | Price /100 ml     |
|------------------------|---------------|-----------|-------------------|
| Stempro@hESC SFM (kit) | ThermoFischer | A1000701  | 110.80 CHF        |
| BDNF                   | ThermoFischer | PHC7074   | 157.20 CHF        |
| GDNF                   | ThermoFischer | PHC7044   | 134.00 CHF        |
| dbcAMP                 | Merck Sigma   | D0627     | 51.20 CHF         |
| 2phospho-Ascorbic Acid | Merck Sigma   | 49752     | 0.01 CHF          |
| <b>Total</b>           |               |           | <b>453.21 CHF</b> |

| Diff2 medium | Supplier | Reference | Price /100 ml     |
|--------------|----------|-----------|-------------------|
| Diff1 medium |          |           | 453.21 CHF        |
| NDM medium   |          |           | 25.04 CHF         |
| <b>Total</b> |          |           | <b>478.25 CHF</b> |

| NDM medium             | Supplier      | Reference | Price /100 ml    |
|------------------------|---------------|-----------|------------------|
| Neurobasal™ Plus (kit) | ThermoFischer | A3653401  | 24.76 CHF        |
| GlutaMAX™-I Supplement | ThermoFischer | 35050038  | 0.28 CHF         |
| <b>Total</b>           |               |           | <b>25.04 CHF</b> |

### Medium cost of minibrains in 6 well plate

| Week diff           | 0        | 1         | 2            | 3        | 4        | 5        | 6        | 7        | 8                | 52               |
|---------------------|----------|-----------|--------------|----------|----------|----------|----------|----------|------------------|------------------|
| Medium              | Prolif   | Diff-1    | 50-50 Diff-2 |          |          | NDM      |          |          |                  |                  |
| Price/Well/week     | 3.00 CHF | 11.33 CHF | 5.98 CHF     | 5.98 CHF | 5.98 CHF | 0.63 CHF | 0.63 CHF | 0.63 CHF | 0.63 CHF         |                  |
| Total/well          |          |           |              |          |          |          |          |          | <b>34.77 CHF</b> | <b>62.32 CHF</b> |
| Total for 10 plates |          |           |              |          |          |          |          |          | #####            | #####            |
